# Supplementary material
Source: publisher site journal article supplement (https://www.dovepress.com/article/336915)
Supplement: Supplementary file 1 [file get_supplementary_file.php]

**Table S-1. Assumptions and Justifications Used to Develop Model**

|  | **Assumptions** | **Justifications** |
| --- | --- | --- |
| **1** | Day-to-day asthma symptoms health state was assumed to include the occurrence of symptom free periods as well as non-clinically significant exacerbations (morning, night-time and day-time symptoms). | - The HRQoL of patients having non-clinically significant exacerbations or symptom free periods was no different than the day-to-day asthma symptom state. - Consistent with previous economic evaluations in asthma.b-e |
| **2** | Day-to-day asthma symptoms utility will be assumed different for IND/GLY/MFa due to the expected impact of treatment on asthma symptoms. | - IND/GLY/MF pivotal trials have shown that the quality of life of symptomatic patients with IND/GLY/MF is better than the comparators considered (captured via EQ-5D/AQLQ).f, g |
| **3** | Upon treatment discontinuation or non-response, patients on both treatment and comparator were assumed to return to high dose ICS/LABA and hence, assumed to have ICS/LABA efficacy. | - High dose ICS/LABA is considered the standard-of-care in chronic moderate-to-severe asthma management as per GINA guidelines.h - Consistent with previous economic evaluations in asthma [including add-on tiotropium, a direct comparator to IND/GLY/MF].b-e, i |
| **4** | Asthma exacerbation mortality has not been considered in the base case, as there were no asthma related deaths in the trials.  However, model has a placeholder to consider it in a scenario, if required. | - There were no asthma related deaths observed in IND/GLY/MF pivotal trials.f, g |
| **5** | The model assumes 100% compliance with IND/GLY/MF and hence treatment response has not been considered in the base case, however, it can be considered in scenario analysis. | - Discontinuation from treatment with IND/GLY/MF were observed to be low, as per the pivotal trials.f, g |
| **6** | For the purpose of this model, the moderate exacerbation rates were estimated as all exacerbations except severe exacerbations (all exacerbations – severe exacerbations) | - Definition of moderate exacerbations not consistent across trials. - Consistent with expert clinician's suggestion after reviewing global model |

**Abbreviations:** AQLQ, Asthma Quality of Life Questionnaire; GINA, Global Initiative for Asthma; HRQoL, Health related quality of life; ICS, low-dose inhaled corticosteroids; IND/GLY/MF, indacaterol acetate/glycopyrronium bromide/mometasone furoate; LABA, long-acting beta2-agonists

a 150/50/160 μg, once daily

b National Institute for Health and Care Excellence. Benralizumab for Treating Severe Asthma Guidance. 2019. Available at: https://www.nice.org.uk/guidance/TA565/history.

c National Institute for Health and Care Excellence. Final Appraisal Determination – Mepolizumab for Treating Severe Refractory Eosinophilic Asthma 2016. Available at: https://www.nice.org.uk/guidance/ta431/documents/final-appraisal-determination-document. Accessed September 8, 2020.

d National Institute for Health and Care Excellence. Omalizumab for Treating Severe Persistent Allergic Asthma. Technology Appraisal Guidance [TA278]. 2013. Available at: https://www.nice.org.uk/Guidance/TA278. Accessed September 8, 2020.

e Tice JA, Walsh JME, Synnott P, et al. Institute for Clinical and Economic Review. Biologic Therapies for Treatment of Asthma Associated with Type 2 Inflammation: Effectiveness, Value, and Value-Based Price Benchmarks. Final Evidence Report. 2018; https://icer.org/wp-content/uploads/2020/10/ICER_Asthma-Final-Report_Unredacted_08122020.pdf. Accessed August 20, 2021.

f ClinicalTrials.gov: NCT02571777. Study to Compare the Efficacy and Safety of QVM149 With QMF149 in Patients With Asthma. 2020. https://clinicaltrials.gov/ct2/show/NCT02571777. Accessed June 4, 2020.

g ClinicalTrials.gov: NCT03158311. Study to Compare QVM149 and Free Triple Combination of Salmeterol/Fluticasone + Tiotropium (ARGON). 2020. https://clinicaltrials.gov/ct2/show/NCT03158311. Accessed June 4, 2020.

h Global Initiative for Asthma. Global Strategy for Asthma Management and Prevention. 2020. https://ginasthma.org/wp-content/uploads/2020/06/GINA-2020-report_20_06_04-1-wms.pdf.

i Willson J, Bateman ED, Pavord I, Lloyd A, Krivasi T, Esser D. Cost effectiveness of tiotropium in patients with asthma poorly controlled on inhaled glucocorticosteroids and long-acting beta-agonists. Appl Health Econ Health Policy. Aug 2014;12(4):447-459.

**Table S-2. Health Care Resource Use for Different Types of Exacerbations**

|  | Moderate Exacerbation | Severe Exacerbation | | |
| --- | --- | --- | --- | --- |
| OCS Burst | ED Visit | Hospitalization |
| GP visit (unscheduled ) |  | 1 | 1 | 1 |
| ED visit |  |  | 1 |  |
| Hospital (general ward), per stay |  | N/A | N/A | 1 |
| Hospital outpatient visits |  | N/A | N/A | 1 |
| Nurse educator |  | N/A | 1 | 1 |
| Prednisone, days of medicationa | 3 | 5 | 5 | 30 |

**Abbreviation:** N/A, not applicable.

aAssumptions were based on Canadian clinical practice

**Table S-3. Costs of Units, Adverse Events, and Monitoring**

|  | Unit costs (CAD$) | Source |
| --- | --- | --- |
| GP visit (unscheduled ) | 77.20 | Ontario Schedule of Benefits for Physician Servicesa |
| ED visit | 422.05 | Ontario Case Costing Toolb |
| Hospital (general ward), per stay | 4,230.88 | Ontario Case Costing Toolb |
| Hospital outpatient visits | 298.15 | Ontario Case Costing Toolb |
| Prednisone | 0.17 | Ontario Drug Benefits eFormularyc |
| Nurse educator | 37.94 | Statistics Canada, Table: 14-10-0307-01 . Employee wages by occupation, annuald |

a Ontario Ministry of Health and Long Term Care. Schedule of Benefits, Physician Services Under the Health Insurance Act. 2020; <http://www.health.gov.on.ca/en/pro/programs/ohip/sob/physserv/sob_master20200306.pdf>. Accessed March 5, 2020.

b Ontario Case Costing Initiative (OCCI). CIHI patient cost estimator. 2020; <https://www.ontario.ca/data/ontario-case-costing-initiative-occi.49>. Accessed March 3, 2020.

c Government of Ontario. Ontario Drug Benefit Formulary/Comparative Drug Index Queen's Printer for Ontario 2020. 2020; <https://www.formulary.health.gov.on.ca/formulary/>. Accessed March 15, 2020.

d Statistics Canada. Catalogue no. 82-625-X. Health Fact Sheets, Chronic Conditions, 2016. <https://www150.statcan.gc.ca/n1/pub/82-625-x/2017001/article/54858-eng.htm>. Accessed November 18, 2019.

**Table S-4. Parameters for Probabilistic Sensitivity Analyses From ARGON Triala**

| Parameter | Treatment | Mean | Distribution | Parameter 1 | Parameter 2 |
| --- | --- | --- | --- | --- | --- |
| Efficacy – exacerbation rates |  |  |  |  |  |
| Moderate exacerbation | IND/GLY/MF | 0.340 | Lognormal | -1.081 | 0.060 |
|  | SAL/FLU+TIO | 0.540 | Lognormal | -0.617 | 0.051 |
| Severe exacerbation |  |  |  |  |  |
| Hospitalized exacerbation | IND/GLY/MF | 0.018 | Lognormal | -4.026 | 0.134 |
|  | SAL/FLU+TIO | 0.016 | Lognormal | -4.144 | 0.135 |
| ED exacerbation | IND/GLY/MF | 0.018 | Lognormal | -4.026 | 0.134 |
|  | SAL/FLU+TIO | 0.016 | Lognormal | -4.144 | 0.135 |
| OCS burst exacerbation | IND/GLY/MF | 0.324 | Lognormal | -1.136 | 0.134 |
|  | SAL/FLU+TIO | 0.288 | Lognormal | -1.254 | 0.135 |
| Disutility |  |  |  |  |  |
| Hospitalized exacerbation | N/A | 0.200 | Lognormal | -1.611 | 0.051 |
| ED exacerbation | N/A | 0.100 | Lognormal | -2.304 | 0.051 |
| OCS burst exacerbation | N/A | 0.100 | Lognormal | -2.304 | 0.051 |
| Utility |  |  |  |  |  |
| Day-to-day symptom | IND/GLY/MF | 0.755 | Lognormal | -1.410 | 0.078 |
| Day-to-day symptom | SAL/FLU+TIO | 0.742 | Lognormal | -1.357 | 0.073 |
| Costs |  |  |  |  |  |
| Drug | IND/GLY/MF | 1251.82 | Gamma | 384.146 | 3.259 |
| Drug | SAL/FLU+TIO | 1976.62 | Gamma | 384.146 | 5.145 |
| Moderate exacerbation | N/A | 0.521 | Gamma | 384.146 | 0.001 |
| Severe exacerbation |  |  |  |  |  |
| Hospitalized exacerbation | N/A | 4649.38 | Gamma | 384.146 | 12.103 |
| ED exacerbation | N/A | 538.06 | Gamma | 384.146 | 1.401 |
| OCS burst exacerbation | N/A | 78.07 | Gamma | 384.146 | 0.203 |
| Discount cost | N/A | 1.50% | Normal | 0.015 | 0.001 |
| Discount outcome | N/A | 1.50% | Normal | 0.015 | 0.001 |

**Abbreviations:** ED, emergency department visit; IND/GLY/MF, indacaterol acetate/glycopyrronium bromide/mometasone furoate; N/A, not applicable; OCS, oral corticosteroid; SAL/FLU, salmeterol/ fluticasone; TIO, tiotropium.

a ClinicalTrials.gov: NCT03158311. Study to compare QVM149 and free triple combination of salmeterol/fluticasone + tiotropium (ARGON). 2020. https://clinicaltrials.gov/ct2/show/NCT03158311. Accessed June 4, 2020.

**Table S-5. Parameters for Probabilistic Sensitivity Analyses From IRIDIUM Triala**

| Parameter | Treatment | Mean | Distribution | Parameter 1 | Parameter 2 |
| --- | --- | --- | --- | --- | --- |
| Efficacy – exacerbation rates |  |  |  |  |  |
| Moderate exacerbation | IND/GLY/MF | 0.480 | Lognormal | -0.736 | 0.064 |
|  | SAL/FLU | 0.780 | Lognormal | -0.249 | 0.026 |
| Severe exacerbation |  |  |  |  |  |
| Hospitalized exacerbation | IND/GLY/MF | 0.013 | Lognormal | -4.347 | 0.088 |
|  | SAL/FLU | 0.023 | Lognormal | -3.797 | 0.079 |
| ED exacerbation | IND/GLY/MF | 0.013 | Lognormal | -4.347 | 0.088 |
|  | SAL/FLU | 0.023 | Lognormal | -3.797 | 0.079 |
| OCS burst exacerbation | IND/GLY/MF | 0.234 | Lognormal | -1.456 | 0.088 |
|  | SAL/FLU | 0.405 | Lognormal | -0.907 | 0.079 |
| Disutility |  |  |  |  |  |
| Hospitalized exacerbation | N/A | 0.200 | Lognormal | -1.611 | 0.051 |
| ED exacerbation | N/A | 0.100 | Lognormal | -2.304 | 0.051 |
| OCS burst exacerbation | N/A | 0.100 | Lognormal | -2.304 | 0.051 |
| Utility |  |  |  |  |  |
| Day-to-day symptom | IND/GLY/MF | 0.775 | Lognormal | -1.496 | 0.088 |
| Day-to-day symptom | SAL/FLU | 0.766 | Lognormal | -1.452 | 0.000 |
| Costs |  |  |  |  |  |
| Drug | IND/GLY/MF | 1251.82 | Gamma | 384.146 | 3.259 |
| Drug | SAL/FLU | 1316.00 | Gamma | 384.146 | 3.426 |
| Moderate exacerbation | N/A | 0.52 | Gamma | 384.146 | 0.001 |
| Severe exacerbation |  |  |  |  |  |
| Hospitalized exacerbation | N/A | 4649.38 | Gamma | 384.146 | 12.103 |
| ED exacerbation | N/A | 538.06 | Gamma | 384.146 | 1.401 |
| OCS burst exacerbation | N/A | 78.07 | Gamma | 384.146 | 0.203 |
| Discount cost | N/A | 1.50% | Normal | 0.015 | 0.001 |
| Discount outcome | N/A | 1.50% | Normal | 0.015 | 0.001 |

**Abbreviations:** ED, emergency department visit; IND/GLY/MF, indacaterol acetate/glycopyrronium bromide/mometasone furoate; N/A, not applicable; OCS, oral corticosteroid; SAL/FLU, salmeterol/ fluticasone.

a ClinicalTrials.gov: NCT02571777. Study to compare the efficacy and safety of QVM149 with QMF149 in patients with asthma. 2020. https://clinicaltrials.gov/ct2/show/NCT02571777. Accessed June 4, 2020.

**Figure S-1. Incremental Cost-Effectiveness Ratio Formulas**

**Abbreviations:** ICER = Incremental Cost-Effectiveness Ratio; IND/GLY/MF = mometasone furoate/indacaterol acetate/glycopyrronium bromide; SAL/FLU = fluticasone/salmeterol; TIO = tiotropium.
